# Supplementary material for: Characterization of Five Meloidogyne incognita Effectors Associated with PsoRPM3
Source: MDPI journal article supplement (doi:10.3390/ijms23031498), 2022-01-28
Supplement: s1 [file s1]

# Characterization of Five *Meloidogyne incognita* Effectors Associated with PsoRPM3

Wenjiang Pu <sup>†</sup>, Kun Xiao <sup>†</sup>, Sifang Luo, Haifeng Zhu, Zizhen Yuan, Chaoyuan Gao and Jianfang Hu <sup>\*</sup>

Table S1. PsoRPM3's IP result.

| Protein Accession Number<br>(in NCBI Database)  | Protein Accession Number<br>(in <i>Meloidogyne incognita</i> Database) | Types of Nematodes                                                                                                                                             | Signal Peptide | Molecular Weight (KD) | Fasta Headers                                                                                                                                                                                            | LFQ Intensity CK | LFQ Intensity CL |
|-------------------------------------------------|------------------------------------------------------------------------|----------------------------------------------------------------------------------------------------------------------------------------------------------------|----------------|-----------------------|----------------------------------------------------------------------------------------------------------------------------------------------------------------------------------------------------------|------------------|------------------|
| AHB20148.1;AAO16990.1;AAO16989.1                | Non                                                                    | <i>Meloidogyne enterolobii</i>                                                                                                                                 |                |                       | >AHB20148.1 actin                                                                                                                                                                                        | 0                | 39731000         |
| AHX24635.1;AHX24634.1;AHX24633.1;AHX24632.1     | Minc3s00127g05433                                                      | <i>Meloidogyne incognita</i> ,<br><i>Meloidogyne hispanica</i> ,<br><i>Meloidogyne arenaria</i> ,<br><i>Meloidogyne javanica</i> ,<br><i>Meloidogyne hapla</i> | Yes            | 46.35                 | >AHX24635.1 calreticulin, partial;<br>>AHX24634.1 calreticulin, partial;<br>>AHX24633.1 calreticulin, partial;<br>>AHX24632.1 calreticulin, partial                                                      | 0                | 5696900          |
| AAN15809.1                                      | scaffold166774_cov71.g22242                                            | <i>Meloidogyne incognita</i>                                                                                                                                   | Yes            | 45.86                 | >AAN15809.1 putative esophageal gland cell secretory protein 29                                                                                                                                          | 0                | 3862500          |
| ACI43068.1                                      | Non                                                                    | <i>Capsicum annuum</i>                                                                                                                                         |                |                       | >ACI43068.1 NBS-LRR root-knot nematode resistance protein                                                                                                                                                | 0                | 3651700          |
| AAV87529.1                                      | Minc3s00081g03887                                                      | <i>Meloidogyne incognita</i>                                                                                                                                   | Yes            | 40.99                 | >AAV87529.1 chymotrypsin-like serine proteinase                                                                                                                                                          | 0                | 2533800          |
| AHG55039.1                                      | Non                                                                    | <i>Meloidogyne enterolobii</i>                                                                                                                                 |                |                       | >AHG55039.1 heat shock protein 70                                                                                                                                                                        | 0                | 1834000          |
| YP_009029729.1;AHY20093.1                       | Non                                                                    | <i>Meloidogyne chitwoodi</i>                                                                                                                                   |                |                       | >YP_009029729.1 NADH dehydrogenase subunit 3 (mitochondrion);<br>>AHY20093.1 NADH dehydrogenase subunit 3 (mitochondrion)                                                                                | 0                | 1035400          |
| YP_009040641.1;CDI40117.1;AUX81265.1;AHN16445.1 | Non                                                                    | <i>Meloidogyne graminicola</i>                                                                                                                                 |                |                       | >YP_009040641.1 NADH dehydrogenase subunit 6 (mitochondrion);<br>>CDI40117.1 NADH dehydrogenase respiratory chain subunit 6 (mitochondrion);<br>>AUX81265.1 NADH dehydrogenase subunit 6 (mitochondrion) | 0                | 798410           |
| sp Q9ZSK2.1 ADF6_ARATH                          | Non                                                                    | RecName                                                                                                                                                        |                |                       | >sp Q9ZSK2.1 ADF6_ARATH<br>RecName: Full=Actin-depolymerizing factor 6; Short=ADF-6; Short=AtADF6                                                                                                        | 0                | 653130           |
| AHN52302.1                                      | Minc3s00642g15511                                                      | <i>Meloidogyne incognita</i>                                                                                                                                   | No             | 19.96                 | >AHN52302.1 programmed cell death protein 6                                                                                                                                                              | 0                | 478740           |

|                                                                                                                                                                                                                                        |                   |                                                                                            |    |        |  |                                                                                                                                                                                                               |   |        |
|----------------------------------------------------------------------------------------------------------------------------------------------------------------------------------------------------------------------------------------|-------------------|--------------------------------------------------------------------------------------------|----|--------|--|---------------------------------------------------------------------------------------------------------------------------------------------------------------------------------------------------------------|---|--------|
| ACF71478.1;ACF71476.1;ACF71475.1;ACF71474.1;ACF71468.1;ACF71477.1;ACF71473.1;ACF71472.1;ACF71471.1;ACF71470.1;ACF71469.1;ACF71467.1;ACF71466.1;ACF71465.1;ACF71464.1;ACF71463.1;ACF71462.1;CBA18120.1;CBA18119.1;CBA18118.1;CBA18117.1 | Non               | <i>Meloidogyne hapla</i> ,<br><i>Meloidogyne javanica</i> ,<br><i>Meloidogyne arenaria</i> |    |        |  | >ACF71478.1 major sperm protein, partial;<br>>ACF71476.1 major sperm protein, partial;<br>>ACF71475.1 major sperm protein, partial;<br>>ACF71474.1 major sperm protein, partial                               | 0 | 425760 |
| AFG25450.1                                                                                                                                                                                                                             | Minc3s01334g22880 | <i>Meloidogyne incognita</i>                                                               | No | 35.86  |  | >AFG25450.1 t04g9.4, partial [Meloidogyne incognita]                                                                                                                                                          | 0 | 318720 |
| ALG00081.1                                                                                                                                                                                                                             | Non               | <i>Purpureocillium lilacinum</i>                                                           |    |        |  | >ALG00081.1 glycoside hydrolase family 31                                                                                                                                                                     | 0 | 242300 |
| ATO58929.1;ATO58928.1;ATO58916.1;ATO58936.1;ATO58935.1;ATO58930.1;ATO58921.1;ARU79877.1                                                                                                                                                | Non               | <i>Meloidogyne enterolobii</i>                                                             |    |        |  | >ATO58929.1 cytochrome oxidase subunit 1, partial (mitochondrion);<br>>ATO58928.1 cytochrome oxidase subunit 1, partial (mitochondrion);<br>>ATO58916.1 cytochrome oxidase subunit 1, partial (mitochondrion) | 0 | 132620 |
| CAU15484.1;CAU15486.1                                                                                                                                                                                                                  | Non               | <i>Meloidogyne artiellia</i>                                                               |    |        |  | >CAU15484.1 heat shock protein 90 [Meloidogyne artiellia];<br>>CAU15486.1 heat shock protein 90 [Meloidogyne artiellia]                                                                                       | 0 | 104070 |
| AAY84711.2                                                                                                                                                                                                                             | Minc3s07235g40885 | <i>Meloidogyne incognita</i>                                                               | No | 179.48 |  | >AAY84711.2 dual oxidase                                                                                                                                                                                      | 0 | 46631  |
| ADM16640.1                                                                                                                                                                                                                             | Non               | <i>Meloidogyne javanica</i>                                                                |    |        |  | >ADM16640.1 putative transmembrane cation transporter                                                                                                                                                         | 0 | 35593  |

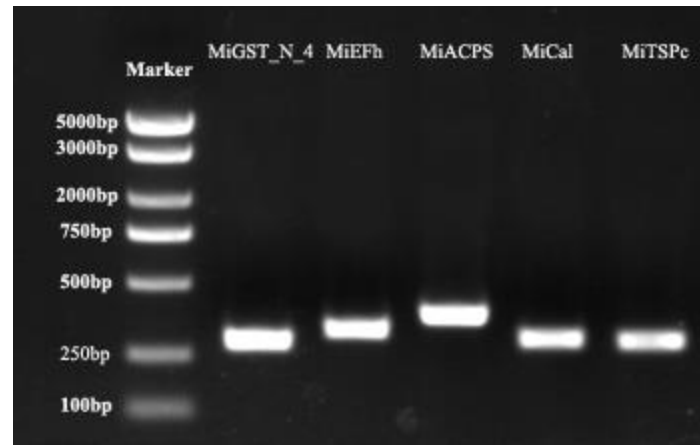

**Figure S1.** *In situ* probe primer specific detection of all effectors. Through gel electrophoresis, a single target amplified by the *in situ* probe primers of MiGST\_N\_4 (288bp), MiEFh (354bp), MiACPS (388bp), MiCaI (304bp), MiTSPc (302bp) was detected between 250 bp and 500 bp.
